# Supplementary material for: 3-Mercaptopropionic, 4-Mercaptobenzoic, and Oleic Acid-Capped CdSe Quantum Dots: Interparticle Distance, Anchoring Groups, and Surface Passivation
Source: Hindawi journal article supplement (doi:10.1155/2019/2796746), 2019-02-18
Supplement: f1 [file 2796746.f1.docx]

Supporting information

3-Mercaptopropionic, 4-Mercaptobenzoic and oleic acid-capped CdSe quantum dots: interparticle distance, anchoring groups and surface passivation

José Augusto Lucena,1 Fabio Baum,2 Emerson C. Kohrausch,2 Fabiele C. Tavares,2 Tatiane Pretto,¹ Francisco P. dos Santos,1 Jacqueline F. Leite Santos,1,2 Sherdil Khan,3* Marcos J. Leite Santos1,2*

1Instituto de Química, Universidade Federal do Rio Grande do Sul, 91501-970 Porto Alegre, RS, Brazil

2Programa de Pos-Graduacão em Ciências de Materiais (PGCIMAT), Universidade Federal do Rio Grande do Sul, 91501-970 Porto Alegre, RS, Brazil

3 Instituto de Física, Universidade Federal do Rio Grande do Sul, Av Bento Goncalves 9500, Porto Alegre-RS, Brazil.

Correspondence should be addressed to Sherdil Khan: [sherdiljadoon@gmail.com](mailto:sherdiljadoon@gmail.com)


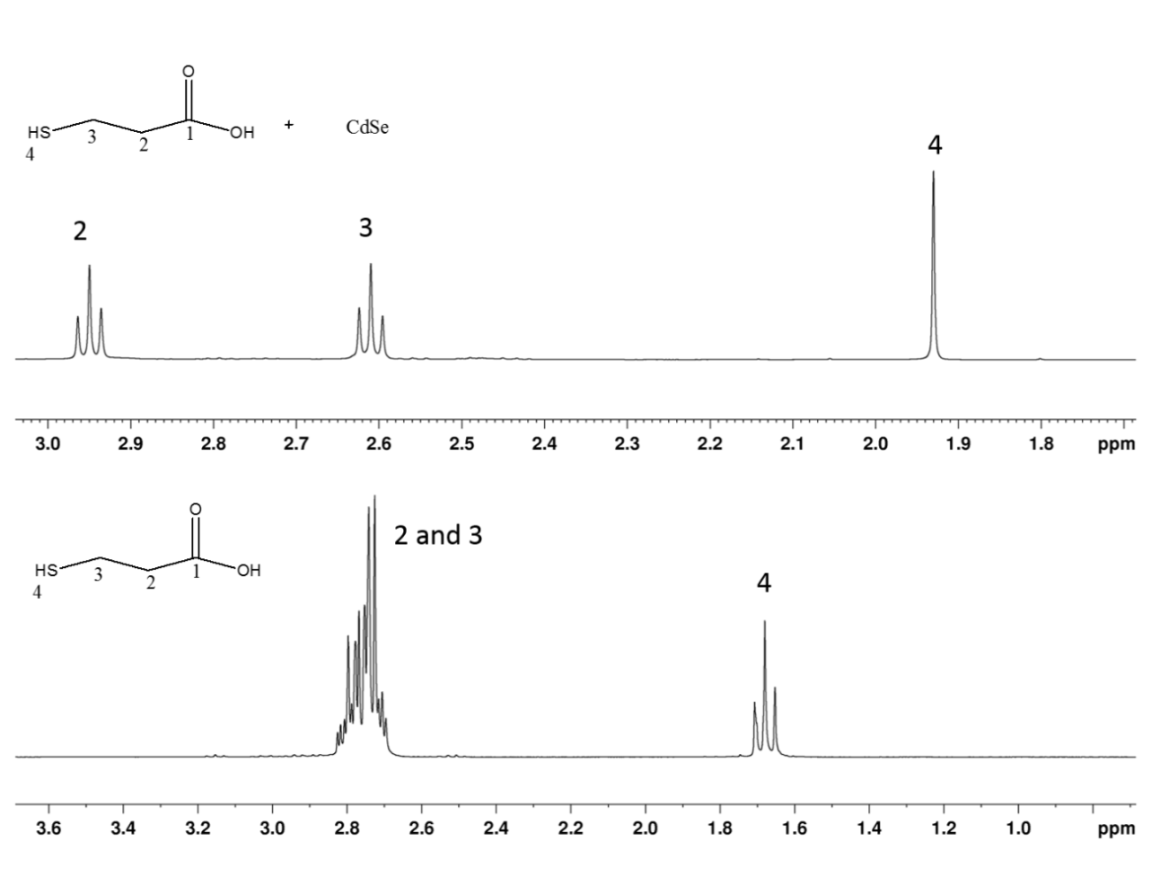


Figure S1: Expansion of the 1H NMR spectra of a) CdSe/MPA and b) pure MPA.


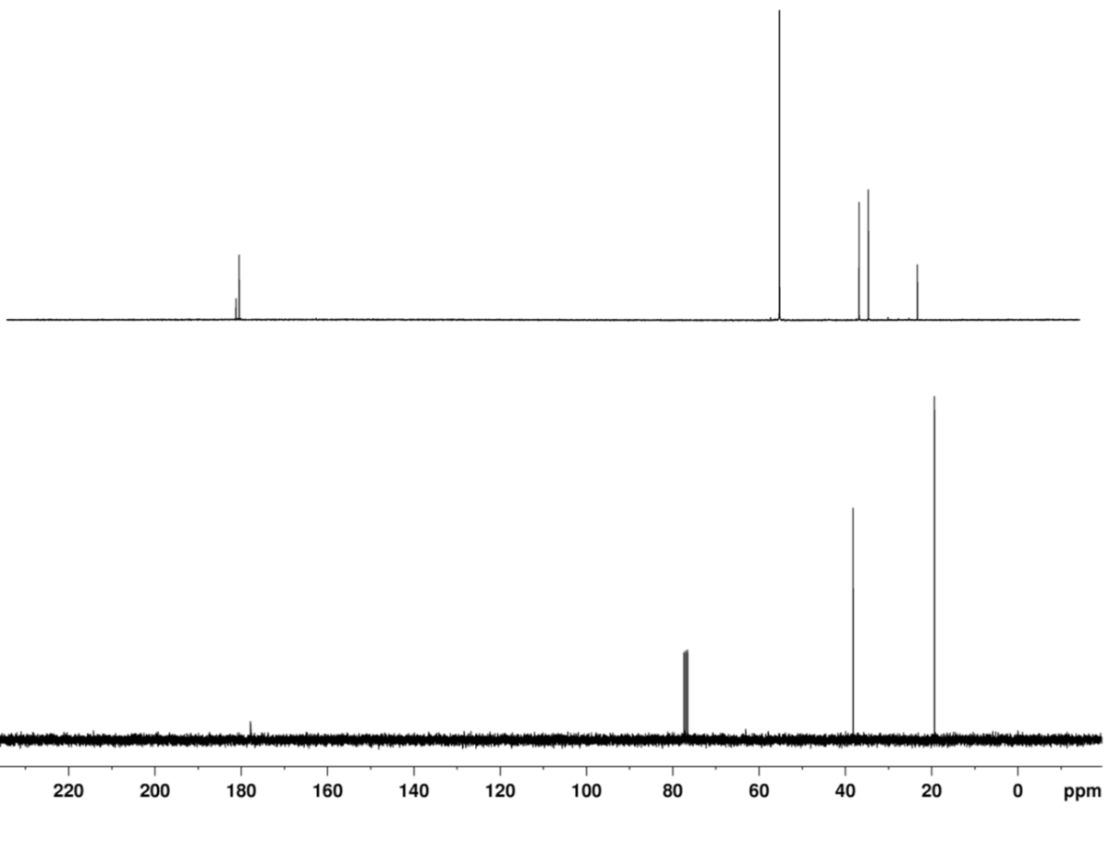


Figure S2. 13C NMR spectra of a) pure MPA and b) CdSe/MPA.


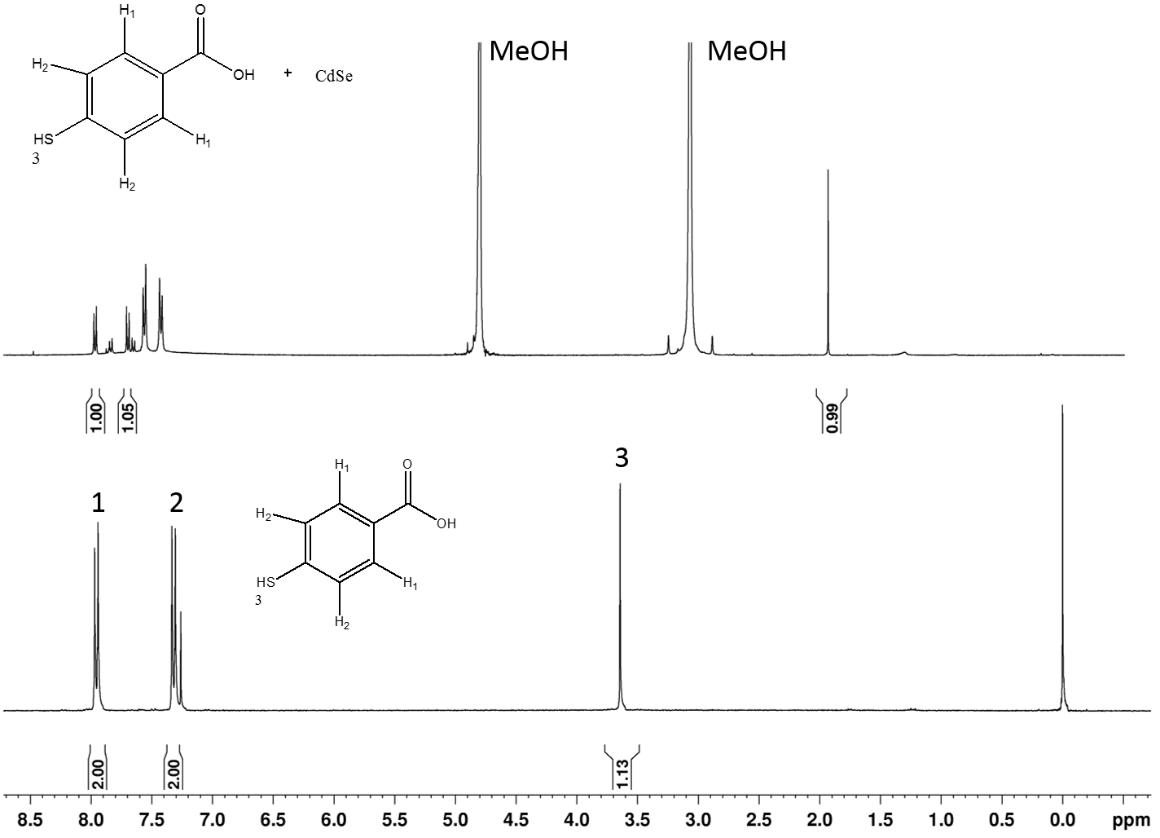


Figure S3. 1H NMR spectra of a) CdSe/MBA and b) MBA.


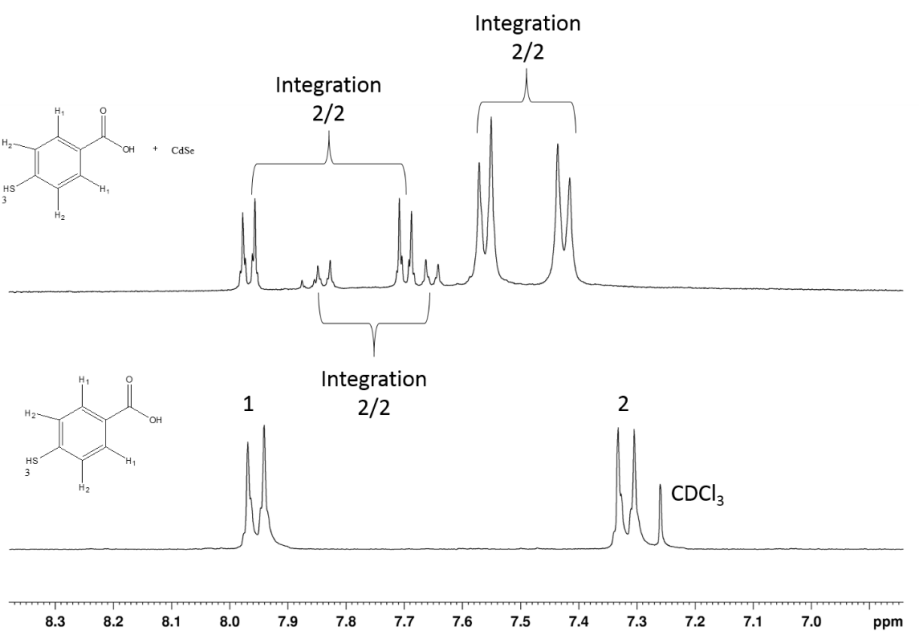


Figure S4. Expansion of aromatic hydrogen of the 1H a) CdSe/MBA e b) pure MBA.
